# Supplementary material for: Cardiovascular disease risk factors among school children of Bangladesh: a cross-sectional study
Source: HighWire-hosted journal article supplement (doi:10.1136/bmjopen-2020-038077), 2020-10-01
Supplement: bmjopen-2020-038077supp003_data_supplement.pdf [file bmjopen-2020-038077supp003_data_supplement.pdf]

**Cardiovascular Diseases Risk Factors in School Children of urban and rural area of Bangladesh**

**Name of interviewer:**

**Date of interview:**

**Time of interview:**

**Respondent Identification**

**Name of Respondent:**

**ID no:**

**Address:**

**Contact number:**

**Demographic Information**

| S.No. | Questions                              | Response                                                                                                                                                                 | Code |
|-------|----------------------------------------|--------------------------------------------------------------------------------------------------------------------------------------------------------------------------|------|
| 01    | How old are you?                       | .....Years                                                                                                                                                               |      |
| 02    | Gender of the respondent               | <ul style="list-style-type: none"> <li>• Male-1</li> <li>• Female-2</li> </ul>                                                                                           |      |
| 03    | What is your religion?                 | <ul style="list-style-type: none"> <li>• Muslim-1</li> <li>• Hindu-2</li> <li>• Buddhist-3</li> <li>• Christian-4</li> </ul>                                             |      |
| 04    | In which class you are studying?       | <ul style="list-style-type: none"> <li>• Class VIII-1</li> <li>• Class IX-2</li> <li>• Class X-3</li> </ul>                                                              |      |
| 05    | What is your Parents education?        |                                                                                                                                                                          |      |
| A     | Mothers                                | <ul style="list-style-type: none"> <li>• Illiterate-1</li> <li>• Primary-2</li> <li>• SSC-3</li> <li>• HSC-4</li> <li>• Graduate-5</li> <li>• Post graduate-6</li> </ul> |      |
| B     | Fathers                                | <ul style="list-style-type: none"> <li>• Illiterate-1</li> <li>• Primary-2</li> <li>• SSC-3</li> <li>• HSC-4</li> <li>• Graduate-5</li> <li>• Post graduate-6</li> </ul> |      |
| 06    | What is the occupation of your parent? | <ul style="list-style-type: none"> <li>• Service holder-1</li> </ul>                                                                                                     |      |

|    |                                                                                   |                                                                                                                                                                                                                            |  |
|----|-----------------------------------------------------------------------------------|----------------------------------------------------------------------------------------------------------------------------------------------------------------------------------------------------------------------------|--|
|    |                                                                                   | <ul style="list-style-type: none"> <li>• Business-2</li> <li>• Agriculture-3</li> <li>• Housewife-4</li> <li>• Others (specify).....</li> </ul>                                                                            |  |
| 07 | What is your place of residence?                                                  | <ul style="list-style-type: none"> <li>• Urban-1</li> <li>• Rural-2</li> </ul>                                                                                                                                             |  |
| 08 | Kindly tell me the average monthly earnings of your household? (Parent will help) | .....BDT                                                                                                                                                                                                                   |  |
| 09 | Do your parent (father/mother) have any chronic diseases? (Parent will help)      | <ul style="list-style-type: none"> <li>• Yes-1</li> <li>• No-2</li> </ul>                                                                                                                                                  |  |
| 10 | If yes, mention the name of the disease listed here. (Parent will help)           | <ul style="list-style-type: none"> <li>• Hypertension-1</li> <li>• Heart Disease-2</li> <li>• Diabetes Mellitus-3</li> <li>• Cancer-4</li> <li>• Chronic Respiratory Disease-5</li> <li>• Others (specify).....</li> </ul> |  |
| 11 | Do your parent (father/mother) have smoking habit?                                | <ul style="list-style-type: none"> <li>• Yes-1</li> <li>• No-2</li> </ul>                                                                                                                                                  |  |
| 12 | Do your parent (father/mother) have the habit of smokeless tobacco use?           | <ul style="list-style-type: none"> <li>• Yes-1</li> <li>• No-2</li> </ul>                                                                                                                                                  |  |
| 13 | If yes, what is the type?                                                         | <ul style="list-style-type: none"> <li>• Zarda-1</li> <li>• Sada pata-2</li> <li>• Gul-3</li> <li>• Others (specify).....</li> </ul>                                                                                       |  |
| 14 | Do your parent (father/mother) consume alcohol?                                   | <ul style="list-style-type: none"> <li>• Yes-1</li> <li>• No-2</li> </ul>                                                                                                                                                  |  |

### Part three: History of Behavioral Risk factors

| S.No | Questions                                                      | Response       | Code |
|------|----------------------------------------------------------------|----------------|------|
| 15   | <b>Food Habit</b>                                              |                |      |
| a.   | How many days per week usually do you intake fruits?           | Days:          |      |
| b.   | How many servings of fruit do you intake a day? (USE SHOWCARD) | No of serving: |      |
| c.   | How many days per week usually do you intake vegetables?       | Days:          |      |
| d.   | How many servings of vegetables do you intake a day?           | No of serving: |      |

|           |                                                                                                                   |                                                                                                                                      |  |
|-----------|-------------------------------------------------------------------------------------------------------------------|--------------------------------------------------------------------------------------------------------------------------------------|--|
| <b>e.</b> | Do you take extra table salt in your meal?                                                                        | <ul style="list-style-type: none"> <li>• Yes-1</li> <li>• No-2</li> </ul>                                                            |  |
| <b>f.</b> | If yes, mention the frequency                                                                                     | <ul style="list-style-type: none"> <li>• Regular-1</li> <li>• Occasionally-2</li> <li>• Never-3</li> </ul>                           |  |
| <b>g.</b> | How many days in a usual week do you take fast-food? (Burger,Sandwich,Pizza etc.)                                 | Days:                                                                                                                                |  |
| <b>h.</b> | How many days in a usual week do you take fatty rich food? (Birani,Tahari etc.)                                   | Days:                                                                                                                                |  |
| <b>i.</b> | How many days in a usual week do you have empty caloric drink? (Coca Cola, Pepsi, Fanta, 7up, Energy drinks etc.) | Days:                                                                                                                                |  |
| <b>16</b> | <b>Smoking &amp; Others Habit</b>                                                                                 |                                                                                                                                      |  |
| <b>a.</b> | Do you have smoking habit currently?                                                                              | <ul style="list-style-type: none"> <li>• Yes-1</li> <li>• No-2</li> </ul>                                                            |  |
| <b>b.</b> | If yes, Duration of smoking?                                                                                      | .....days/months/years                                                                                                               |  |
| <b>c.</b> | Number of stick per day?                                                                                          | ..... stick                                                                                                                          |  |
| <b>d.</b> | Do you consume smokeless tobacco?                                                                                 | <ul style="list-style-type: none"> <li>• Yes-1</li> <li>• No-2</li> </ul>                                                            |  |
| <b>e.</b> | If yes, what is the type?                                                                                         | <ul style="list-style-type: none"> <li>• Zarda-1</li> <li>• Sada pata-2</li> <li>• Gul-3</li> <li>• Others (specify).....</li> </ul> |  |
| <b>f.</b> | Duration of consumption                                                                                           | .....days/months/years                                                                                                               |  |
| <b>g.</b> | Do you consume alcohol currently?                                                                                 | <ul style="list-style-type: none"> <li>• Yes-1</li> <li>• No-2</li> </ul>                                                            |  |
| <b>h.</b> | If yes, Duration of consumption                                                                                   | .....days/months/years                                                                                                               |  |
| <b>17</b> | <b>Physical inactivity</b>                                                                                        |                                                                                                                                      |  |
| <b>a.</b> | What is the distance between your home and school?                                                                | .....km                                                                                                                              |  |
| <b>b.</b> | What is your way of going to school?                                                                              | <ul style="list-style-type: none"> <li>• Walking-1</li> <li>• Rickshaw/Van-2</li> <li>• Car-3</li> <li>• Bus-4</li> </ul>            |  |
| <b>c.</b> | How much weight of your back pack?                                                                                | .....kg                                                                                                                              |  |
| <b>d.</b> | How much total time do you expend in school on an average day?                                                    | .....hours                                                                                                                           |  |

|           |                                                                |            |
|-----------|----------------------------------------------------------------|------------|
| <b>e.</b> | What is the time expand you to watch TV?                       | .....hours |
| <b>f.</b> | How much time do you expand in playing outdoor games in a day? | .....hours |
| <b>g.</b> | How long do you expand in playing video game?                  | .....hours |

**Part four: Physical Measurements**

| <b>S.No</b> | <b>Questions</b>               | <b>Response</b> |
|-------------|--------------------------------|-----------------|
| <b>18</b>   | <b>Anthropometric Measures</b> |                 |
| <b>a.</b>   | Height                         | .....cm         |
| <b>b.</b>   | Weight                         | .....kg         |
| <b>c.</b>   | Waist circumference            | .....cm         |
| <b>d.</b>   | Hip circumference              | .....cm         |

**Signature of the interviewer**
