# Supplementary material for: Cardiovascular disease risk factors among school children of Bangladesh: a cross-sectional study
Source: HighWire-hosted journal article supplement (doi:10.1136/bmjopen-2020-038077), 2020-10-01
Supplement: bmjopen-2020-038077supp005_data_supplement.pdf [file bmjopen-2020-038077supp005_data_supplement.pdf]

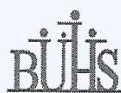

বাংলাদেশ ইউনিভার্সিটি অব হেলথ সায়েন্সেস

**BANGLADESH UNIVERSITY OF HEALTH SCIENCES**

Memo No: BUHS/BIO/EA/17/3

Date: 25.11.2017

To  
T.M. Monzurul Islam  
Student, MPhil in NCD  
Dept. of Community Medicine  
BIHS

**Subject: Ethical Clearance**

The Ethical Review Committee (ERC) of the Bangladesh University of Health Sciences (BUHS) has the pleasure to accord ethical clearance to your Protocol “**Cardiovascular disease risk factors in school children of urban and rural areas of Bangladesh**” subject to the condition that the guidelines overleaf must be followed carefully.



(Prof MA Hafez)  
Chairman  
Ethical Review Committee

125/1 Darus Salam Mirpur Dhaka – 1216 Email : [info@buhs.ac.bd](mailto:info@buhs.ac.bd) Website: [www.buhs.ac.bd](http://www.buhs.ac.bd)

### **The ethical guidelines to be followed by the principal and co – investigators**

- The right and welfare of individual volunteer are adequately protected.
- The methods to secure informed consent are fully appropriate (in the case of minors, consent should be obtained from parents or guardians) and adequate measures are taken to safeguard confidentiality of information.
- The investigator(s) assume the responsibility of notifying to the ethical review committee of any change in methodology of the protocol whether or not any risk to the individual volunteers is involved.
- To immediately report to ethical review committee if any evidence of unexpected or adverse reaction is noted in the subject under study.
- This proposal is subjected to PI's reading and accepting the ethical review Principles and Guidelines currently on operation.

125/1 Darus Salam Mirpur Dhaka – 1216 Email : [vc@buhs-edu.org](mailto:vc@buhs-edu.org) website: [www.buhsedu.org](http://www.buhsedu.org)
